# Supplementary material
Source: PubMed Central journal article supplement (PMC7462338)
Supplement: rcmb.2019-0446OC_he_data_supplement.pdf [file rcmb.2019-0446OC_he_data_supplement.pdf]

**N-Glycosylation Regulates Chitinase 3-like-1 and IL-13 Ligand Binding to IL-13 Receptor  $\alpha$ 2**

**Chuan Hua He, Chun Geun Lee, Bing Ma, Suchitra Kamle, Augustine M.K. Choi, and**

**Jack A. Elias**

ONLINE DATA SUPPLEMENT

## ONLINE SUPPLEMENTAL DATA

### MATERIALS AND METHODS

#### *Yeast 2-hybrid assays*

The full-length human IL-13R $\alpha$ 2 gene was amplified by PCR from human lung cDNA using the following primers (forward, 5'-AAG GTT TTC CAT ATG (Nde1) GGA GAA ATG GCT TTC GTT TGC-3'; reverse, 5'-GTC TCT TGA TAT CTC GAG (Xho1) TCT TCA TGT ATC ACG GAA-3'). IL-13R $\alpha$ 2 mutants that had defects in N-glycosylation were prepared from the wild type (WT) construct by replacing one or all of the N-glycosylation by site-directed mutagenesis (Table S2). The full length Chi311 and IL-13 genes were amplified as previously described by our laboratory (8, 21). The IL-13R $\alpha$ 2 DNA was cloned into the yeast two-hybrid BD vector at the *Nde1* and *Sall* sites. The Matchmaker System 3 two-hybrid assay using *S. cerevisiae* (Clontech, Palo Alto, CA) was used to detect interactions between WT and mutated IL-13R $\alpha$ 2 and Chi311 or IL-13. The screening and identification of specific interacting molecules was undertaken according to the procedures described by our laboratory (8).

#### *Cell culture*

The THP-1 cells that were used were cytokine preconditioned as described previously (8, 23). MLE12 lung epithelial cell were obtained from the American Type culture Collection (ATCC; Rockville, MD).

#### *Preparation and stimulation of peritoneal macrophages*

Peritoneal macrophages were isolated from 7-week-old IL-13R $\alpha$ 2 null and WT mice according to the previously described procedures (19). which had been injected intraperitoneally 3 days earlier with 3ml of thioglycolate. The collected cells were washed twice with PBS and then cultured in DMEM containing 10%

heat-inactivated FBS, 1mM glutamine, 100 IU/ml penicillin and 0.1 mg/ml of streptomycin at a density of  $2 \times 10^6$  cells/ml. The cells were then allowed to adhere for 3 h to a 24-well culture flask at 37°C in 5% CO<sub>2</sub> and air. The cultures were then washed twice with PBS to remove non-adherent cells before the addition of 1ml of fresh medium. Antibodies against F4/80 (565410, PharMingen, San Diego, CA) and FACS analysis on a FACSCaliber apparatus (Becton Dickinson, San Jose, CA) were used to assess cellular purity (>95%). In select experiments macrophages were incubated with rChi311 or vehicle control. Experiments with rChi311 were done in the absence of serum.

### ***Co-Immunoprecipitation (Co-IP)***

To assess interactions between IL-13R $\alpha$ 2 and its ligands, epithelial cells were co-transfected with IL-13R $\alpha$ 2 and plasmids (pcDNA3.1) containing either Chi311 or IL-13. Lysates from these cells were subjected to immunoprecipitation using anti-hIL-13R $\alpha$ 2 mouse monoclonal antibody (R&D systems, Minneapolis, MN) or antibodies against Chi311 (R&D systems) or IL-13 (Abcam, Cambridge, MA). Catch and Release v2.0 Reversible Immunoprecipitation System (EMD Millipore, Bedford, MA) was used for these Co-IP evaluations according as per the manufacturer's instruction. The precipitates were then evaluated by immunoblotting with antibodies against IL-13R $\alpha$ 2, Chi311 or IL-13 as previously described by our laboratory (8, 19).

### ***Immunoblotting***

Protein lysates were prepared from cultured cells or whole lungs using RIPA lysis buffers and subjected to immunoblotting using a modification of procedures described previously by our laboratory (5). ChemiDoc MP gel imaging system (BioRad) was used to capture the gel images and further image analysis including densitometry.

## SUPPLEMENTAL TABLES

Table S1. Primer Sequences and Locations Used for Real time analysis of mRNA expression

| Point mutation site | Primer Set Name | Primer Sequence         |
|---------------------|-----------------|-------------------------|
| STT3A               | STT3A-UP        | TGTCGATGGCTGCTGTGTTAT   |
|                     | STT3A-DN        | CAGAAACCGGGTAGTCCGAT    |
| STT3B               | STT3B-UP        | ATCCACGAGTTCGACCCGT     |
|                     | STT3B-DN        | ACCATGCTCTTTCATCAAACCA  |
| DAD1                | DAD1-UP         | TGAAGTTGCTGGACGCCTATC   |
|                     | DAD1-DN         | AAGCCAGAGAGGAACGAGTTG   |
| N33                 | N33-UP          | TTGCGCTACCTGCCTACTG     |
|                     | N33-DN          | CTGCTCCACTTTTTCAGCCAA   |
| OST4                | OST4-UP         | TCGCCATCTTCGCCAACAT     |
|                     | OST4-DN         | TGCCACGTAGTGATAGAGGAC   |
| RPN1                | RPN1-UP         | GCTTCATCCGTATCCGACTCA   |
|                     | RPN1-DN         | CCAGTTTCACTCGCATGGT     |
| RPN2                | RPN2-UP         | CAGTGGTGTCCAATACATTCACG |
|                     | RPN2-DN         | TGTTGAGCTGAGTCCAGTAGAT  |

Table S2. Primer Sequences and Locations Used to Generate hIL-13R $\alpha$ 2 Point Mutation.

| Point mutation site          | Primer Set Name | Primer Sequence                                     |
|------------------------------|-----------------|-----------------------------------------------------|
| No Mutation<br>(Full Length) | FL-AD1          | AAG GTT TTC CAT ATG GGA GAA ATG GCT TTC GTT TGC     |
|                              | FL-AD2          | GTC TCT TGA TAT CTC GAG TCT TCA TGT ATC ACG GAA     |
| 115<br>AAT TO CAG            | 115-AD-FW       | CAG GGA TCA GAA GTT CAA AGT TCC TGG GCA GAA ACT     |
|                              | 115-AD-RV       | TGT GCA TTG CCA TGG TAA AAG CGT GTG TAT CTT CGC     |
| 168<br>AAT TO CAG            | 168-AD-FW       | CAG TAC AAC TTG TTT TAC TGG TAT GAG CGG TTG GAT     |
|                              | 168-AD-RV       | GGT ATC AAG AAG TAC ACC TAT GCC AGG TTT CCA AGA     |
| 215<br>AAT TO CAG            | 215-AD-FW       | CAG GGA TCA TCA GAG AAC AAG CCT ATC AGA TCC AGT     |
|                              | 215-AD-RV       | AAC ACA AAT ATA GAA ATC TTT ATA GTC TGA TGC CTC CAA |
| 299<br>AAT TO CAG            | 299-AD-FW       | CAG GAA ACC CGA CAA TTAT GCT TTG TAG TAA GAA GCA    |
|                              | 299-AD-RV       | TGT TGT TTT CAA GGT GTA TGT TTC ATT TTC AAC TGT AGC |

## Supplemental Figure

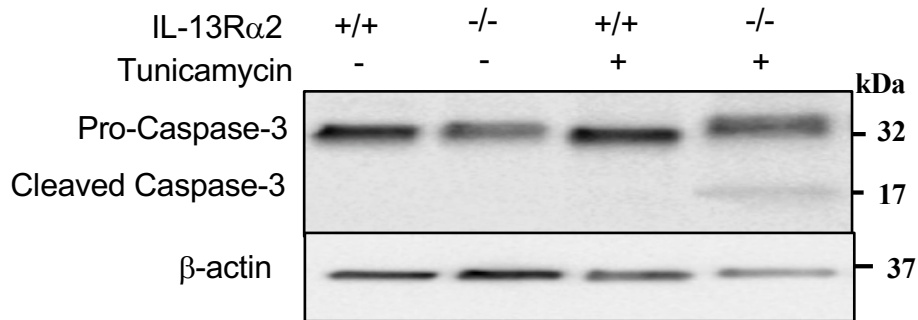

**Fig. S1. Tunicamycin induced caspase 3 activation (cleavage) in the absence of IL-13R $\alpha$ 2.** Peritoneal macrophages isolated from WT (+/+) and IL-13R $\alpha$ 2 null mutant mice (-/-) were stimulated with and without tunicamycin treatment (2mg/ml). After overnight incubation, cells were harvested and total cell lysates were subjected to immunoblot assays with anti-Caspase-3 antibody that detects both pro- and active (cleaved) forms of Caspase-3.
